# Supplementary material for: Platelet Abnormalities in Children with Laboratory-Confirmed Influenza
Source: MDPI journal article supplement (doi:10.3390/diagnostics13040634), 2023-02-08
Supplement: s1 [file s1]

Supplementary table S2. A correlation between platelet parameters (platelet count- PLT, mean platelet volume- MPV, mean platelet volume/platelet count ratio- MPV/PLT, platelet to lymphocyte ratio- PLT/LYM) and hydration status parameters (pH, HCO<sub>3</sub>, and base excess) for the whole study group and age subgroups; the results from Spearmann’s rank correlation test. The results are showed as correlation coefficients, statistically significant results are marked in red. Abbreviations: yo- years old, BE- base excess.

|                                         | WHOLE GROUP |                  |       |  | UNDER 1YO                               |                  |       |      | 1-2YO |                                         |       |       | 2-5YO |                  |                                         |       | >5YO  |                  |    |                                         |       |       |       |
|-----------------------------------------|-------------|------------------|-------|--|-----------------------------------------|------------------|-------|------|-------|-----------------------------------------|-------|-------|-------|------------------|-----------------------------------------|-------|-------|------------------|----|-----------------------------------------|-------|-------|-------|
|                                         | pH          | HCO <sub>3</sub> | BE    |  | pH                                      | HCO <sub>3</sub> | BE    |      | pH    | HCO <sub>3</sub>                        | BE    |       | pH    | HCO <sub>3</sub> | BE                                      |       | pH    | HCO <sub>3</sub> | BE |                                         |       |       |       |
| Platelet count<br>[10 <sup>3</sup> /μL] | -0.06       | -0.15            | -0.17 |  | Platelet count<br>[10 <sup>3</sup> /μL] | -0.16            | 0.09  | 0.03 |       | Platelet count<br>[10 <sup>3</sup> /μL] | -0.18 | 0.06  | -0.07 |                  | Platelet count<br>[10 <sup>3</sup> /μL] | -0.12 | -0.27 | -0.27            |    | Platelet count<br>[10 <sup>3</sup> /μL] | -0.07 | -0.11 | -0.12 |
| MPV [fL]                                | 0.08        | 0.09             | 0.12  |  | MPV [fL]                                | 0.14             | 0.14  | 0.24 |       | MPV [fL]                                | 0.07  | -0.08 | 0.01  |                  | MPV [fL]                                | 0.03  | 0.04  | 0.03             |    | MPV [fL]                                | 0.08  | 0.06  | 0.09  |
| MPV/PLT                                 | 0.08        | 0.14             | 0.17  |  | MPV/PLT                                 | 0.18             | -0.08 | 0.00 |       | MPV/PLT                                 | 0.17  | -0.08 | 0.06  |                  | MPV/PLT                                 | 0.12  | 0.25  | 0.25             |    | MPV/PLT                                 | 0.08  | 0.05  | 0.06  |
| PLT/LYM                                 | -0.08       | 0.05             | 0.02  |  | PLT/LYM                                 | -0.01            | 0.16  | 0.17 |       | PLT/LYM                                 | 0.18  | -0.01 | 0.09  |                  | PLT/LYM                                 | -0.19 | -0.18 | -0.23            |    | PLT/LYM                                 | -0.15 | -0.12 | -0.16 |
