# Supplementary material for: Platelet Abnormalities in Children with Laboratory-Confirmed Influenza
Source: MDPI journal article supplement (doi:10.3390/diagnostics13040634), 2023-02-08
Supplement: s1 [file s1]

Supplementary table S1. A comparison of platelet parameters based upon gender for the whole study group and within the age groups; the p value for statistically significant differences is marked in red.

| whole group                             | MALE    |         |         | FEMALE  |         |         |          |
|-----------------------------------------|---------|---------|---------|---------|---------|---------|----------|
|                                         | median  | LQ      | UQ      | median  | LQ      | UQ      | p        |
| Platelet count<br>[10 <sup>3</sup> /μL] | 238.000 | 182.000 | 306.000 | 250.500 | 191.500 | 329.500 | 0.075146 |
| MPV [fL]                                | 9.800   | 9.300   | 10.300  | 9.600   | 9.100   | 10.200  | 0.042047 |
| MPV/PLT                                 | 0.041   | 0.031   | 0.054   | 0.040   | 0.028   | 0.051   | 0.066924 |
| PLT/LYM                                 | 104.217 | 65.054  | 181.333 | 94.208  | 62.552  | 146.380 | 0.229414 |
| <1yo                                    |         |         |         |         |         |         |          |
| Platelet count<br>[10 <sup>3</sup> /μL] | 302.500 | 247.000 | 407.500 | 356.000 | 246.000 | 451.000 | 0.169036 |
| MPV [fL]                                | 9.700   | 9.300   | 10.200  | 9.900   | 9.200   | 10.400  | 0.358308 |
| MPV/PLT                                 | 0.032   | 0.024   | 0.040   | 0.026   | 0.020   | 0.042   | 0.175121 |
| PLT/LYM                                 | 93.930  | 59.787  | 138.935 | 72.881  | 47.303  | 122.848 | 0.066581 |
| 1-2yo                                   |         |         |         |         |         |         |          |
| Platelet count<br>[10 <sup>3</sup> /μL] | 256.000 | 205.000 | 336.000 | 291.500 | 207.000 | 335.000 | 0.480631 |
| MPV [fL]                                | 10.000  | 9.100   | 10.300  | 9.400   | 8.900   | 9.900   | 0.045900 |
| MPV/PLT                                 | 0.039   | 0.028   | 0.047   | 0.033   | 0.026   | 0.047   | 0.407714 |
| PLT/LYM                                 | 80.308  | 45.567  | 179.487 | 78.829  | 58.367  | 104.762 | 0.801471 |
| 2-5yo                                   |         |         |         |         |         |         |          |
| Platelet count<br>[10 <sup>3</sup> /μL] | 234.000 | 174.000 | 292.000 | 223.000 | 178.000 | 287.000 | 0.833156 |
| MPV [fL]                                | 9.700   | 9.100   | 10.300  | 9.500   | 9.100   | 10.000  | 0.419820 |
| MPV/PLT                                 | 0.041   | 0.032   | 0.059   | 0.044   | 0.034   | 0.054   | 0.906376 |
| PLT/LYM                                 | 97.030  | 57.178  | 186.885 | 93.706  | 67.982  | 138.129 | 0.956603 |
| >5yo                                    |         |         |         |         |         |         |          |
| Platelet count<br>[10 <sup>3</sup> /μL] | 192.500 | 161.000 | 236.000 | 218.000 | 181.000 | 264.000 | 0.026372 |
| MPV [fL]                                | 10.000  | 9.500   | 10.500  | 9.800   | 9.300   | 10.500  | 0.088770 |
| MPV/PLT                                 | 0.053   | 0.041   | 0.065   | 0.045   | 0.038   | 0.057   | 0.048902 |
| PLT/LYM                                 | 136.323 | 90.593  | 205.956 | 134.568 | 101.208 | 222.115 | 0.559909 |
