# Supplementary material for: Platelet Abnormalities in Children with Laboratory-Confirmed Influenza
Source: MDPI journal article supplement (doi:10.3390/diagnostics13040634), 2023-02-08
Supplement: s1 [file s1]

Supplementary table S3. A comparison of hydration status parameters (pH, HCO<sub>3</sub>, and base excess) between the groups with presence (vs absence) of platelet count abnormalities, thrombocytosis, thrombocytopaenia. The comparisons for the whole study group and age subgroups are presented; statistically significant results are marked in red. Abbreviations: yo- years old, BE- base excess.

| WHOLE GROUP<br>ABNORMAL PLATELET COUNT<br>YES |        |       |       | WHOLE GROUP<br>ABNORMAL PLATELET COUNT<br>NO |        |       |       | UNDER 1YO<br>ABNORMAL PLATELET COUNT<br>YES |                          |        |       | UNDER 1YO<br>ABNORMAL PLATELET COUNT<br>NO |                         |       |       | 1-2YO<br>ABNORMAL PLATELET COUNT<br>YES |        |                          |       | 1-2YO<br>ABNORMAL PLATELET COUNT<br>NO |       |                         |       |       |       |        |
|-----------------------------------------------|--------|-------|-------|----------------------------------------------|--------|-------|-------|---------------------------------------------|--------------------------|--------|-------|--------------------------------------------|-------------------------|-------|-------|-----------------------------------------|--------|--------------------------|-------|----------------------------------------|-------|-------------------------|-------|-------|-------|--------|
|                                               | median | LQ    | UQ    |                                              | median | LQ    | UQ    | p                                           |                          | median | LQ    | UQ                                         |                         |       |       | p                                       |        | median                   | LQ    | UQ                                     |       | median                  | LQ    | UQ    | p     |        |
| pH                                            | 7.43   | 7.40  | 7.47  |                                              | 7.43   | 7.41  | 7.46  | 0.5747                                      | pH                       | 7.42   | 7.39  | 7.46                                       |                         | 7.44  | 7.42  | 7.47                                    | 0.0600 | pH                       | 7.42  | 7.39                                   | 7.51  |                         | 7.44  | 7.41  | 7.46  | 0.7607 |
| HCO <sub>3</sub>                              | 22.50  | 21.20 | 24.20 |                                              | 21.70  | 19.70 | 23.30 | 0.0020                                      | HCO <sub>3</sub>         | 22.20  | 20.70 | 24.00                                      |                         | 21.30 | 19.10 | 23.00                                   | 0.1531 | HCO <sub>3</sub>         | 21.20 | 20.45                                  | 22.80 |                         | 19.65 | 18.60 | 21.85 | 0.0789 |
| BE                                            | -1.10  | -2.20 | 0.10  |                                              | -2.00  | -3.50 | -0.40 | 0.0042                                      | BE                       | -1.40  | -3.10 | -0.50                                      |                         | -2.20 | -3.70 | -0.30                                   | 0.4065 | BE                       | -1.95 | -3.45                                  | -0.35 |                         | -3.40 | -4.75 | -1.40 | 0.1671 |
| THROMBOCYTOSIS<br>YES                         |        |       |       | THROMBOCYTOSIS<br>NO                         |        |       |       |                                             | THROMBOCYTOSIS<br>YES    |        |       |                                            | THROMBOCYTOSIS<br>NO    |       |       |                                         |        | THROMBOCYTOSIS<br>YES    |       |                                        |       | THROMBOCYTOSIS<br>NO    |       |       |       |        |
| pH                                            | 7.42   | 7.39  | 7.47  |                                              | 7.43   | 7.41  | 7.46  | 0.1836                                      | pH                       | 7.42   | 7.39  | 7.45                                       |                         | 7.44  | 7.42  | 7.47                                    | 0.0182 | pH                       | 7.42  | 7.39                                   | 7.47  |                         | 7.44  | 7.40  | 7.46  | 0.5778 |
| HCO <sub>3</sub>                              | 21.60  | 20.70 | 24.10 |                                              | 21.80  | 19.90 | 23.50 | 0.3911                                      | HCO <sub>3</sub>         | 21.80  | 20.40 | 24.05                                      |                         | 21.40 | 19.10 | 23.00                                   | 0.2521 | HCO <sub>3</sub>         | 21.20 | 20.60                                  | 23.60 |                         | 19.85 | 18.60 | 21.90 | 0.1243 |
| BE                                            | -1.60  | -3.10 | -0.20 |                                              | -1.80  | -3.30 | -0.30 | 0.7477                                      | BE                       | -1.60  | -3.10 | -0.60                                      |                         | -2.10 | -3.65 | -0.35                                   | 0.7043 | BE                       | -2.40 | -3.50                                  | -0.20 |                         | -3.15 | -4.70 | -1.30 | 0.4040 |
| THROMBOCYTOPAENIA<br>YES                      |        |       |       | THROMBOCYTOPAENIA<br>NO                      |        |       |       |                                             | THROMBOCYTOPAENIA<br>YES |        |       |                                            | THROMBOCYTOPAENIA<br>NO |       |       |                                         |        | THROMBOCYTOPAENIA<br>YES |       |                                        |       | THROMBOCYTOPAENIA<br>NO |       |       |       |        |
| pH                                            | 7.43   | 7.41  | 7.47  |                                              | 7.43   | 7.41  | 7.46  | 0.5581                                      | pH                       | 7.46   | 7.43  | 7.49                                       |                         | 7.43  | 7.41  | 7.47                                    | 0.3128 | pH                       | 7.47  | 7.39                                   | 7.55  |                         | 7.44  | 7.40  | 7.46  | 0.7404 |
| HCO <sub>3</sub>                              | 22.80  | 22.00 | 24.20 |                                              | 21.65  | 19.80 | 23.40 | 0.0009                                      | HCO <sub>3</sub>         | 22.60  | 22.20 | 23.00                                      |                         | 21.40 | 19.30 | 23.30                                   | 0.3870 | HCO <sub>3</sub>         | 21.15 | 20.30                                  | 22.00 |                         | 20.00 | 18.60 | 21.90 | 0.4661 |
| BE                                            | -0.65  | -1.60 | 0.20  |                                              | -1.95  | -3.50 | -0.40 | 0.0004                                      | BE                       | -0.80  | -0.90 | -0.40                                      |                         | -2.10 | -3.50 | -0.40                                   | 0.2203 | BE                       | -1.50 | -2.50                                  | -0.50 |                         | -3.30 | -4.70 | -1.30 | 0.2332 |

|                                         |        |       |       |
|-----------------------------------------|--------|-------|-------|
| 2-5YO<br>ABNORMAL PLATELET COUNT<br>YES |        |       |       |
|                                         | median | LQ    | UQ    |
| pH                                      | 7.44   | 7.42  | 7.47  |
| HCO <sub>3</sub>                        | 22.95  | 21.65 | 24.70 |
| BE                                      | -0.40  | -1.90 | 0.35  |

|                       |       |       |       |
|-----------------------|-------|-------|-------|
| THROMBOCYTOSIS<br>YES |       |       |       |
| pH                    | 7.46  | 7.42  | 7.47  |
| HCO <sub>3</sub>      | 21.70 | 21.20 | 25.70 |
| BE                    | -1.00 | -2.00 | -0.10 |

|                          |       |       |       |
|--------------------------|-------|-------|-------|
| THROMBOCYTOPAENIA<br>YES |       |       |       |
| pH                       | 7.43  | 7.42  | 7.47  |
| HCO <sub>3</sub>         | 23.30 | 22.40 | 24.60 |
| BE                       | -0.20 | -1.80 | 0.50  |

|                                        |        |       |       |
|----------------------------------------|--------|-------|-------|
| 2-5YO<br>ABNORMAL PLATELET COUNT<br>NO |        |       |       |
|                                        | median | LQ    | UQ    |
|                                        |        |       | p     |
|                                        | 7.43   | 7.40  | 7.45  |
|                                        | 0.3387 |       |       |
|                                        | 21.50  | 19.90 | 22.80 |
|                                        | 0.0063 |       |       |
|                                        | -2.10  | -3.50 | -0.90 |
|                                        | 0.0033 |       |       |

|                      |        |       |       |
|----------------------|--------|-------|-------|
| THROMBOCYTOSIS<br>NO |        |       |       |
|                      | 7.43   | 7.40  | 7.45  |
|                      | 0.4673 |       |       |
|                      | 21.70  | 19.90 | 22.90 |
|                      | 0.3043 |       |       |
|                      | -2.00  | -3.40 | -0.60 |
|                      | 0.1528 |       |       |

|                         |        |       |       |
|-------------------------|--------|-------|-------|
| THROMBOCYTOPAENIA<br>NO |        |       |       |
|                         | 7.43   | 7.40  | 7.45  |
|                         | 0.5223 |       |       |
|                         | 21.50  | 19.90 | 22.80 |
|                         | 0.0137 |       |       |
|                         | -2.10  | -3.40 | -0.90 |
|                         | 0.0140 |       |       |

|                                        |        |       |       |
|----------------------------------------|--------|-------|-------|
| >5YO<br>ABNORMAL PLATELET COUNT<br>YES |        |       |       |
|                                        | median | LQ    | UQ    |
| pH                                     | 7.43   | 7.41  | 7.45  |
| HCO <sub>3</sub>                       | 23.85  | 21.70 | 25.00 |
| BE                                     | -0.90  | -1.60 | 0.60  |

|                       |  |  |  |
|-----------------------|--|--|--|
| THROMBOCYTOSIS<br>YES |  |  |  |
| pH                    |  |  |  |
| HCO <sub>3</sub>      |  |  |  |
| BE                    |  |  |  |

|                          |       |       |       |
|--------------------------|-------|-------|-------|
| THROMBOCYTOPAENIA<br>YES |       |       |       |
| pH                       | 7.43  | 7.41  | 7.45  |
| HCO <sub>3</sub>         | 23.85 | 21.70 | 25.00 |
| BE                       | -0.90 | -1.60 | 0.60  |

|                                       |        |       |       |
|---------------------------------------|--------|-------|-------|
| >5YO<br>ABNORMAL PLATELET COUNT<br>NO |        |       |       |
|                                       | median | LQ    | UQ    |
|                                       |        |       | p     |
|                                       | 7.42   | 7.41  | 7.45  |
|                                       | 0.9344 |       |       |
|                                       | 22.70  | 21.20 | 24.40 |
|                                       | 0.2202 |       |       |
|                                       | -1.00  | -2.40 | 0.40  |
|                                       | 0.2604 |       |       |

|                      |        |       |       |
|----------------------|--------|-------|-------|
| THROMBOCYTOSIS<br>NO |        |       |       |
|                      | 7.43   | 7.41  | 7.45  |
|                      | 1.0000 |       |       |
|                      | 22.80  | 21.45 | 24.40 |
|                      | 1.0000 |       |       |
|                      | -1.00  | -2.20 | 0.40  |
|                      | 1.0000 |       |       |

|                         |        |       |       |
|-------------------------|--------|-------|-------|
| THROMBOCYTOPAENIA<br>NO |        |       |       |
|                         | 7.42   | 7.41  | 7.45  |
|                         | 0.9344 |       |       |
|                         | 22.70  | 21.20 | 24.40 |
|                         | 0.2202 |       |       |
|                         | -1.00  | -2.40 | 0.40  |
|                         | 0.2604 |       |       |
